# Supplementary material for: Patients with Cardiovascular Implantable Electronic Devices in the Era of COVID-19 and Their Response to Telemedical Solutions
Source: MDPI journal article supplement (doi:10.3390/medicina58020160), 2022-01-21
Supplement: s1 [file s1]

## Assessment of telemedicine in COVID-19 survey

1. Please indicate your gender:
  - a. Female
  - b. Male
2. Please indicate your age:
  - a. >80 years
  - b. 71-80 years
  - c. 61-70 years
  - d. 51-60 years
  - e. 40-50 years
  - f. 31-40 years
  - g. <30 years
3. Please indicate your place of residence:
  - a. City >1 million residents
  - b. City >100,000 residents <1 million residents
  - c. City <100,000 residents
  - d. Village
4. What cardiac implantable electronic device do you have implanted?
  - a. Cardiac pacemaker (PM)
  - b. Implantable cardioverter defibrillator (ICD)
  - c. Cardiac resynchronization therapy pacemaker/cardioverter-defibrillator (CRT-P/CRT-D)
  - d. Other (for example implantable loop recorder, **ILR**)
5. Have you had regular device ambulatory follow-ups since 11/03/2020 (start of restrictions on outpatient clinics/hospitals)?
  - a. Yes
  - b. No
6. Has the date of the device follow-up been postponed due to the COVID-19 pandemic?
  - a. Yes
  - b. No
7. If yes, how long was the visit postponed for?
  - a. Up to 2 weeks
  - b. Up to one month
  - c. Up to 3 months
  - d. Up to 6 months
  - e. Indefinite period
  - f. My visit has not been postponed
8. Did you have a teleconsultation about your general health and the implanted device?
  - a. Yes
  - b. No
9. If yes, are you satisfied with your teleconsultation?
  - a. Yes
  - b. No
  - c. I did not have a teleconsultation
10. Are you satisfied with this way of contact with your doctor?
  - a. Yes

- b. No
- 11. Would you like teleconsultation with a doctor to be more commonly available?
  - a. Yes
  - b. No
- 12. Is your device controlled by remote monitoring system?
  - a. Yes
  - b. No
- 13. If you answered “No” to the previous question, would you like your device to be controlled by remote monitoring system?
  - a. Yes
  - b. No
  - c. I already have my device controlled by remote monitoring system
- 14. Would you be able to pay the additional fee for remote monitoring system?
  - a. Yes
  - b. No
- 15. If you answered “Yes” to the previous question, what costs per month would you be able to cover?
  - a. Up to 20 PLN
  - b. Up to 50 PLN
  - c. Up to 100 PLN
  - d. Up to 200 PLN
  - e. Up to 500 PLN
  - f. I am not able to cover the costs of telemonitoring
- 16. During the COVID-19 pandemic, have you ever used the e-prescription?
  - a. Yes
  - b. No
- 17. If yes, how would you rate the ability to use such a prescription method on a scale of 0 to 10?  
(0 - worst, 10 - best)
