# Supplementary material for: Patients with Cardiovascular Implantable Electronic Devices in the Era of COVID-19 and Their Response to Telemedical Solutions
Source: MDPI journal article supplement (doi:10.3390/medicina58020160), 2022-01-21
Supplement: s1 [file s1]

Supplementary Table S1. Detailed results of statistical analyses performed.

|                                                                                                                                     | SEX         |             |         | DEVICE     |           |           |         | ACCOMMODATION |                        |                |             |        | AGE         |            |             |             |             |        |
|-------------------------------------------------------------------------------------------------------------------------------------|-------------|-------------|---------|------------|-----------|-----------|---------|---------------|------------------------|----------------|-------------|--------|-------------|------------|-------------|-------------|-------------|--------|
|                                                                                                                                     | Female      | Male        | p value | Pacemaker  | ICD       | CRT       | p value | City >1 mln   | City > 100 000 < 1 mln | City < 100 000 | Village     | p      | <50 yo      | 51-60 yo   | 61-70 yo    | 71-80 yo    | >80 yo      | p      |
| Regular follow-up visits during the pandemic                                                                                        | 52 (54.7)   | 87 (66.4)   | 0.1006  | 83 (68.0)  | 51 (55.4) | 5 (45.5)  | 0.0894  | 65 (73.9)     | 18 (51.4)              | 35 (58.3)      | 21 (48.8)   | 0.0158 | 24 (39.3)   | 17 (68.0)  | 32 (68.1)   | 31 (72.1)   | 35 (70.0)   | 0.0015 |
| Delay of rescheduled follow up visit                                                                                                | 44 (46.3)   | 50 (38.2)   | 0.2757  | 51 (41.8)  | 37 (40.2) | 5 (45.5)  | 0.9345  | 35 (39.8)     | 15 (42.9)              | 26 (43.3)      | 18 (41.9)   | 0.9744 | 28 (45.9)   | 6 (24.0)   | 17 (36.2)   | 19 (44.2)   | 24 (48.0)   | 0.2689 |
| Satisfaction with teleconsultation when with no previous visit                                                                      | 41 (43.2)   | 48 (36.6)   | 0.3943  | 49 (40.2)  | 36 (39.1) | 4 (36.4)  | 0.9643  | 32 (36.4)     | 14 (40.0)              | 24 (40.0)      | 19 (44.2)   | 0.8574 | 16 (26.2)   | 12 (48.0)  | 17 (36.2)   | 27 (62.8)   | 17 (34.0)   | 0.0032 |
| Satisfaction with the performed teleconsultation                                                                                    | 41 (100.0)  | 47 (97.9)   | 0.9467  | 49 (100.0) | 35 (97.2) | 4 (100.0) | 0.9867  | 32 (100.0)    | 14 (100.0)             | 23 (95.8)      | 19 (100.0)  | 0.9976 | 15 (100.0)  | 12 (100.0) | 17 (100.0)  | 26 (96.3)   | 17 (100.0)  | 0.9867 |
| General satisfaction with the interaction with the physician during the teleconsultation for patients with previous in-clinic visit | 58 (61.1)   | 88 (67.2)   | 0.4184  | 81 (66.4)  | 60 (65.2) | 5 (45.5)  | 0.3774  | 62 (70.5)     | 21 (60.0)              | 37 (61.7)      | 26 (60.5)   | 0.5339 | 31 (50.8)   | 15 (60.0)  | 31 (66.0)   | 33 (76.7)   | 36 (72.0)   | 0.0539 |
| Want universal teleconsultations regardless of epidemiological restrictions                                                         | 77 (81.1)   | 99 (75.6)   | 0.4137  | 93 (76.2)  | 77 (83.7) | 5 (45.5)  | 0.013   | 69 (78.4)     | 26 (74.3)              | 48 (80.0)      | 33 (76.7)   | 0.9264 | 51 (83.6)   | 18 (72.0)  | 36 (76.6)   | 34 (79.1)   | 37 (74.0)   | 0.7027 |
| Patients monitored by telemonitoring                                                                                                | 12 (12.6)   | 12 (9.2)    | 0.537   | 9 (7.4)    | 14 (15.2) | 1 (9.1)   | 0.1814  | 6 (6.8)       | 3 (8.6)                | 10 (16.7)      | 5 (11.6)    | 0.2779 | 9 (14.8)    | 2 (8.0)    | 7 (14.9)    | 4 (9.3)     | 2 (4.0)     | 0.3342 |
| Patients who want to be monitored by telemonitoring                                                                                 | 54 (56.8)   | 81 (61.8)   | 0.6976  | 67 (54.9)  | 60 (65.2) | 8 (72.7)  | 0.0367  | 51 (58.0)     | 21 (60.0)              | 40 (66.7)      | 23 (53.5)   | 0.2291 | 41 (67.2)   | 18 (72.0)  | 24 (51.1)   | 24 (55.8)   | 28 (56.0)   | 0.1121 |
| The possibility of paying additional cost from telemonitoring                                                                       | 32 (33.7)   | 46 (35.1)   | 0.935   | 39 (32.0)  | 35 (38.0) | 4 (36.4)  | 0.6474  | 36 (40.9)     | 11 (31.4)              | 19 (31.7)      | 12 (27.9)   | 0.4529 | 28 (45.9)   | 6 (24.0)   | 15 (31.9)   | 16 (37.2)   | 13 (26.0)   | 0.1583 |
| Acceptable monthly fee for                                                                                                          | 59.44±50.03 | 63.08±53.45 | 0.804   | 68.54±60.2 | 54.4±43.5 | 67.5±39.5 | 0.3547  | 71.11±53.76   | 55±48.22               | 40.77±26.06    | 85.83±74.28 | 0.2416 | 67.09±57.46 | 37±26.27   | 66.88±50.56 | 53.89±43.81 | 71.54±62.96 | 0.4256 |

Supplementary Table S1. Detailed results of statistical analyses performed.

|                                                          |           |            |        |            |           |            |        |           |           |           |           |        |           |           |           |           |           |        |
|----------------------------------------------------------|-----------|------------|--------|------------|-----------|------------|--------|-----------|-----------|-----------|-----------|--------|-----------|-----------|-----------|-----------|-----------|--------|
| telemonitoring service                                   |           |            |        |            |           |            |        |           |           |           |           |        |           |           |           |           |           |        |
| Use of the e-prescription system during a pandemic       | 87 (91.6) | 116 (88.5) | 0.6026 | 111 (91.0) | 80 (87.0) | 11 (100.0) | 0.3257 | 84 (95.5) | 28 (80.0) | 56 (93.3) | 35 (81.4) | 0.0123 | 49 (80.3) | 23 (92.0) | 44 (93.6) | 41 (95.3) | 46 (92.0) | 0.0725 |
| Patient rating of the e-prescription system (scale 0-10) | 8.86±1.86 | 8.4±2.14   | 0.0314 | 8.39±2.29  | 8.88±1.6  | 8.45±2.1   | 0.3618 | 8.45±2.02 | 9.14±1.33 | 8.37±2.24 | 8.77±2.15 | 0.2453 | 8.69±2.01 | 9.2±1.44  | 8.74±2.0  | 8.47±2.3  | 8.16±2.02 | 0.0304 |

Data are presented as number (percentage) of patients or mean  $\pm$  standard deviation

#### Statistical analysis

- 10-11 questions – chi-square test
- 12 question - tau-kendalla test

Abbreviations: yo – years old
